# Supplementary material
Source: publisher figshare collection journal article supplement (https://acs.figshare.com/ndownloader/files/4625275)
Supplement: Supplementary file 1 [file 4625275]

## Supporting Information

### A NEW FUNCTIONAL BIS(*meta*-PHENYLENE)-32-CROWN-10-BASED CRYPTAND HOST FOR PARAQUATS

Adam M.-P. Pederson, Ryan C. Vctor,<sup>a</sup> Feihe Huang,<sup>b</sup> Mason A. Rouser, Carla Slebodnick,  
Daniel V. Schoonover, and Harry W. Gibson<sup>\*</sup>

Department of Chemistry, Virginia Polytechnic Institute and State University, Blacksburg, VA,  
USA 24061-0212 Fax: (+1) 540 231 8517; Tel: (+1) 540 231 5902; E-mail: [hwgibson@vt.edu](mailto:hwgibson@vt.edu)

<sup>a</sup> Summer Undergraduate Research Participant, 2006, supported by the National Science Foundation through DMR-0552661 REU.

<sup>b</sup> Present address: Department of Chemistry, Zhejiang University, Hangzhou 310027, P. R. China. Email: [fhuang@zju.edu.cn](mailto:fhuang@zju.edu.cn)

Correspondence Address:  
Professor Harry W. Gibson  
Department of Chemistry  
Virginia Polytechnic Institute and State University  
109 Davidson Hall  
Blacksburg, VA, USA 24061-0212  
Fax: (+1) 540 231 8517  
Tel: (+1) 540 231 5902  
E-mail: [hwgibson@vt.edu](mailto:hwgibson@vt.edu)

#### Table of Contents

|                                                                                              |    |
|----------------------------------------------------------------------------------------------|----|
| Materials and Methods                                                                        | S2 |
| NMR determination of complexation of <b>3</b> •PQ(PF <sub>6</sub> ) <sub>2</sub>             | S3 |
| Full <sup>1</sup> H NMR spectra for <b>3</b> and <b>3</b> *PQ(PF <sub>6</sub> ) <sub>2</sub> | S4 |
| 1D NOESY spectra for <b>3</b> *PQ(PF <sub>6</sub> ) <sub>2</sub>                             | S6 |
| Isothermal Titration Calorimetry                                                             | S8 |

**General:** All reagents and starting materials were purchased from Sigma-Aldrich or Alfa Aesar. Bis(5-bromomethyl-1,3-phenylene)-32-C-10<sup>1</sup> and N,N'-dimethyl-4,4'-bipyridinium bis(hexafluorophosphate),<sup>2</sup> **PQ(PF<sub>6</sub>)<sub>2</sub>**, were prepared according to literature procedures. Thin layer chromatography (TLC) was performed using PE SIL G/UV from Whatman and aluminum oxide 60 F<sub>254</sub> from EMD Chemicals, Inc. Column chromatography was performed with 40-63  $\mu$ m flash silica from Silicycle and aluminum oxide 90 (neutral) from EM Science. Melting points were determined on a Büchi Melting Point B-540 and are uncorrected. NMR analysis was performed in deuterated solvents as received from Cambridge Isotope Laboratories. NMR spectra were obtained on either a Varian Inova 400 MHz or Varian Unity 400 MHz. Chemical shifts are relative to tetramethylenesilane. High resolution fast atom bombardment (HR FAB) mass spectra were obtained on a JEOL HX110 dual focusing mass spectrometer equipped with a FAB probe. Isothermal titration calorimetry was performed on a Microcal instrument.

### NMR determination of complexation of $3 \cdot \text{PQ}(\text{PF}_6)_2$ .

Determination of  $\Delta_o$  was accomplished by measuring the chemical shift of  $\text{H}_1$  of **3** at constant host concentration (1.00 mM) while varying the guest concentration from 1.20 mM to 60.0 mM in acetone- $d_6$  at room temperature (22-23°C).  $\Delta_o$  was determined to be 0.70 ppm.

| $[\text{PQ}(\text{PF}_6)_2]_o$ (mM) | $\text{H}_1$ Chemical Shift (ppm) |
|-------------------------------------|-----------------------------------|
| 0.00                                | 6.160                             |
| 1.20                                | 5.513                             |
| 10.3                                | 5.469                             |
| 30.0                                | 5.467                             |
| 50.5                                | 5.466                             |
| 60.2                                | 5.465                             |

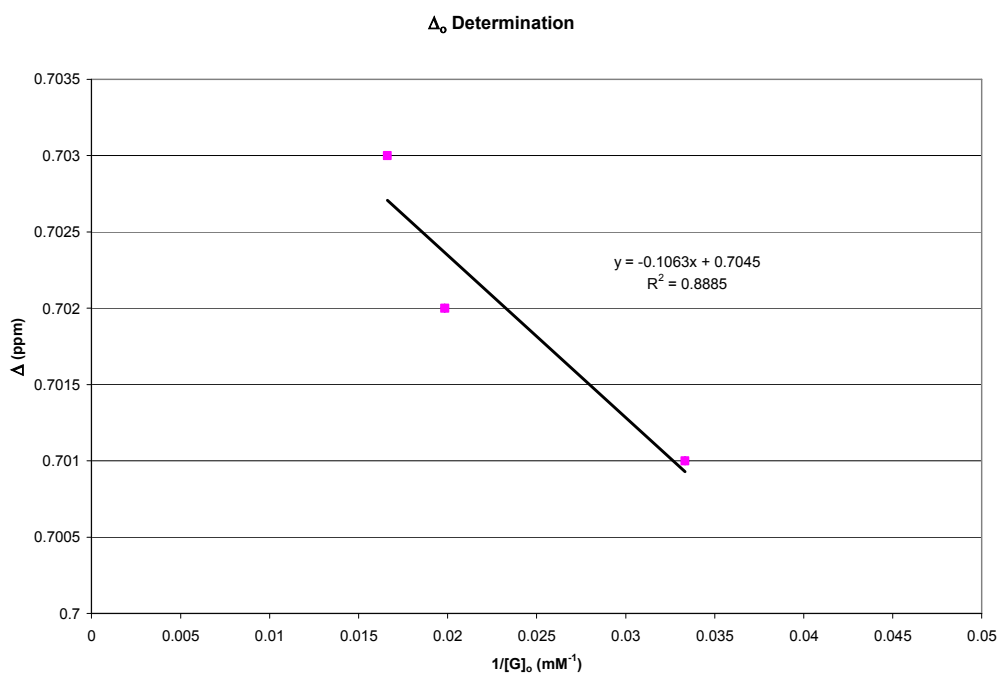

The stoichiometry of  $3 \cdot \text{PQ}(\text{PF}_6)_2$  was determined by the Job plot method<sup>3</sup> (Figure 2). Solutions were made according the following matrix:

| $[\mathbf{3}]_o$ (mM) | $[\text{PQ}(\text{PF}_6)_2]_o$ (mM) | $\text{H}_1$ Chemical Shift (ppm) |
|-----------------------|-------------------------------------|-----------------------------------|
| 0.2                   | 0.8                                 | 5.499                             |
| 0.3                   | 0.7                                 | 5.510                             |
| 0.5                   | 0.5                                 | 5.473                             |
| 0.7                   | 0.3                                 | 5.845                             |
| 0.8                   | 0.2                                 | 6.006                             |

$^1\text{H}$  NMR Spectrum of 1.0 mM **3** in acetone- $d_6$  at 23°C

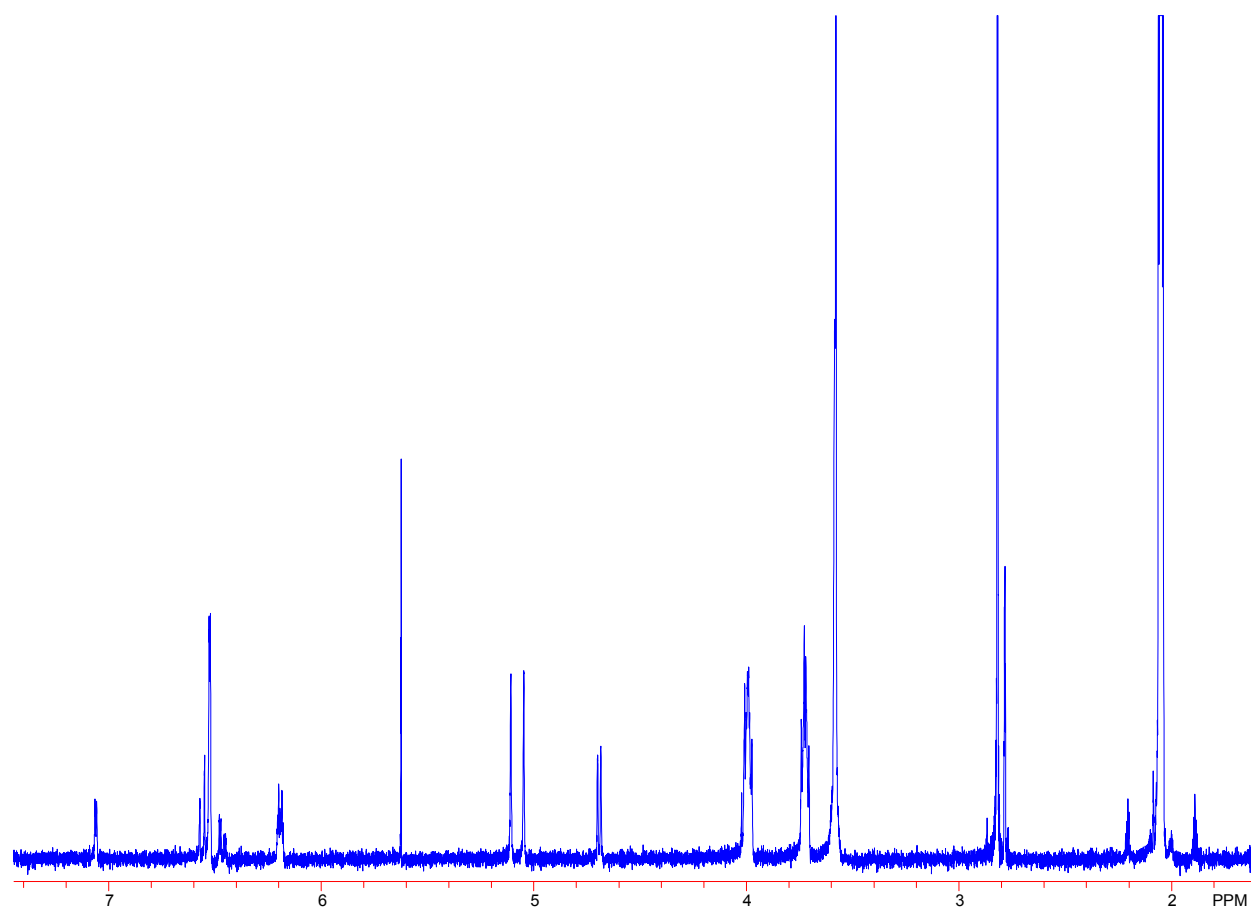

$^1\text{H}$  NMR Spectrum of 1.0 mM **3** and 1.0 mM **PQ(PF<sub>6</sub>)<sub>2</sub>** in acetone-*d*<sub>6</sub> at 23°C

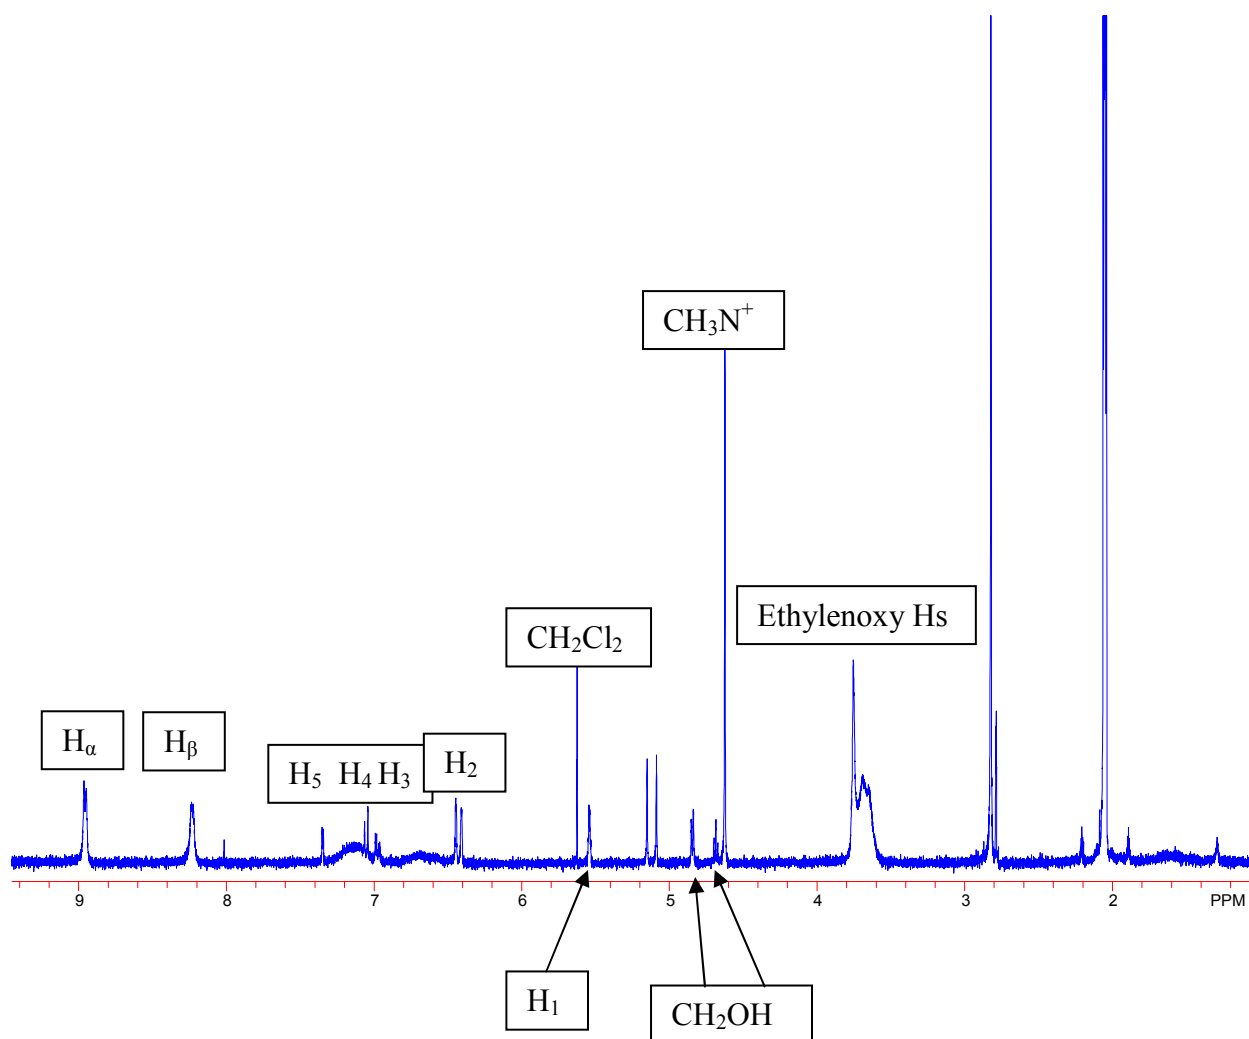

1D NOESY Spectrum of 10.0 mM **3** and 10.0 mM **PQ(PF<sub>6</sub>)<sub>2</sub>** in acetone-*d*<sub>6</sub> at 23°C. Irradiation occurred at H<sub>β</sub> (8.12 ppm) and the relaxation time was 1.0 sec with 256 scans. NOE signals can be seen between H<sub>β</sub> and H<sub>1</sub>, H<sub>2</sub>, H<sub>3</sub>, H<sub>4</sub>, and the ethyleneoxy hydrogens of **3**.

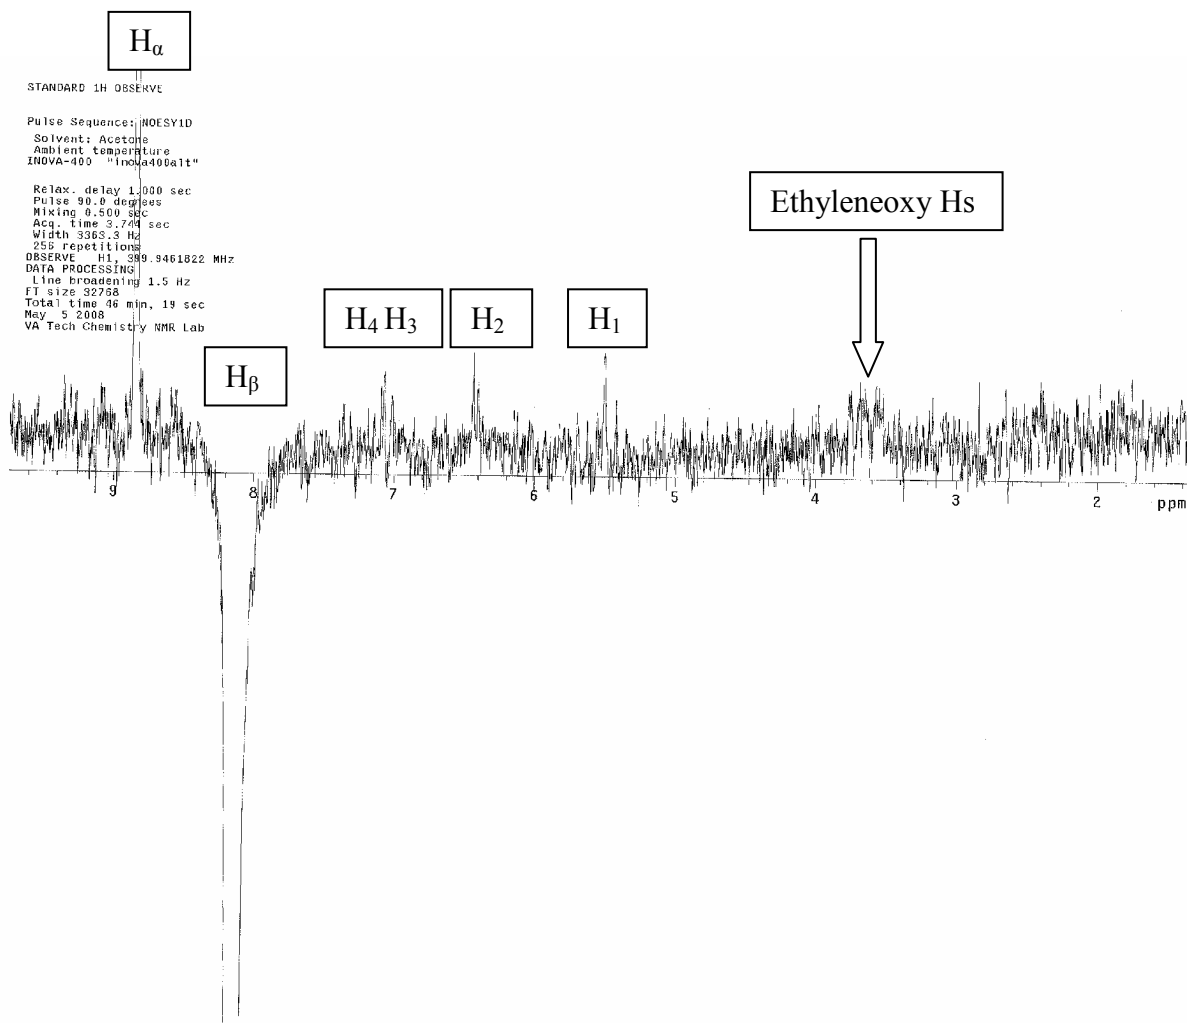

1D NOESY Spectrum of 10.0 mM **3** and 10.0 mM **PQ(PF<sub>6</sub>)<sub>2</sub>** in acetone-*d*<sub>6</sub> at 23°C. Irradiation occurred at H<sub>α</sub> (8.84 ppm) and the relaxation time was 1.0 sec with 256 scans. NOE signals can be seen between H<sub>α</sub> and H<sub>1</sub>, H<sub>2</sub>, H<sub>3</sub>, H<sub>4</sub>, H<sub>5</sub>, hydroxymethylene and the ethyleneoxy hydrogens of **3**.

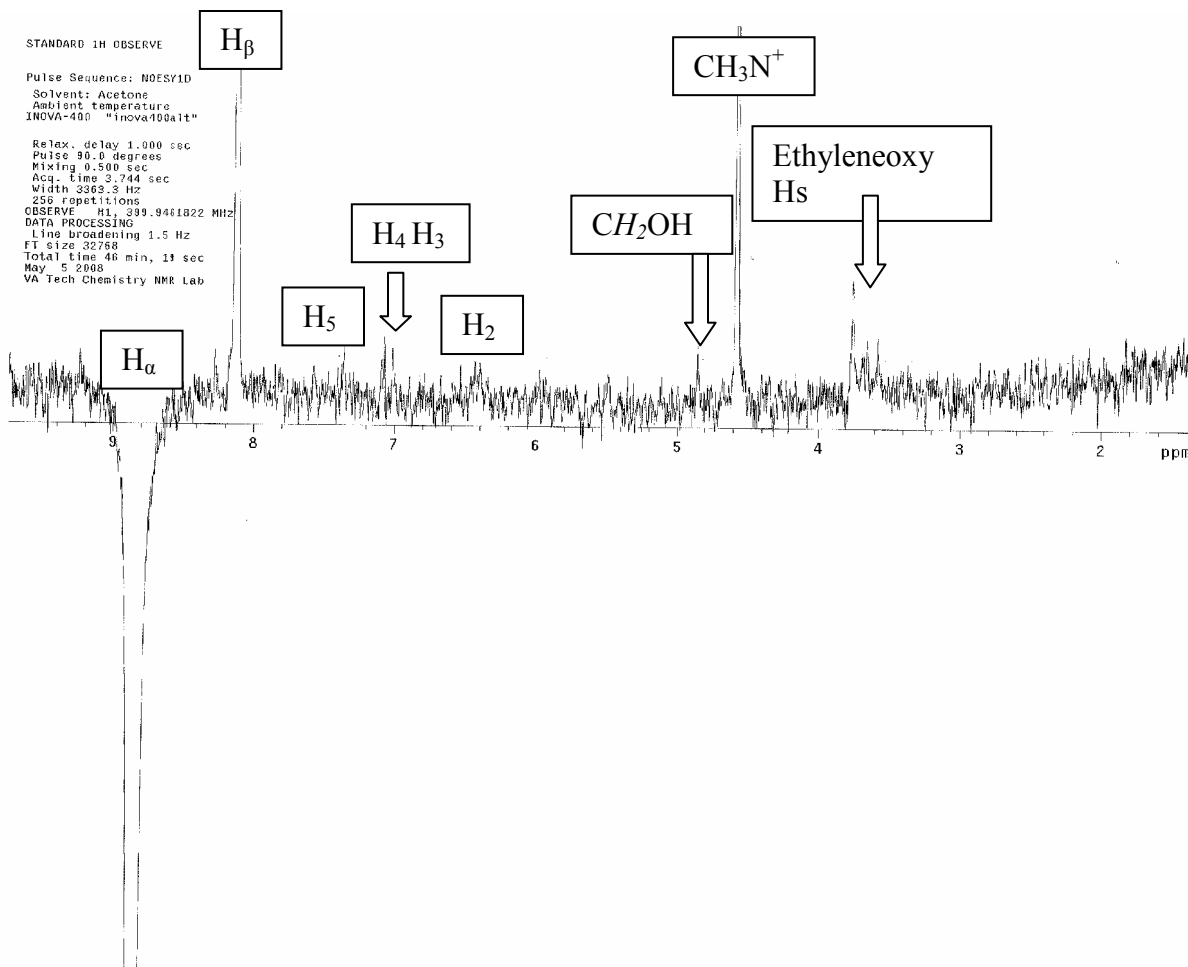

### Isothermal titration calorimetry of 3·PQ(PF<sub>6</sub>)<sub>2</sub>.

PQ(PF<sub>6</sub>)<sub>2</sub> (50.0 mM) was titrated into **3** (1.97 mM) in acetone at 25°C in 30 aliquots of 3.3 µL each.

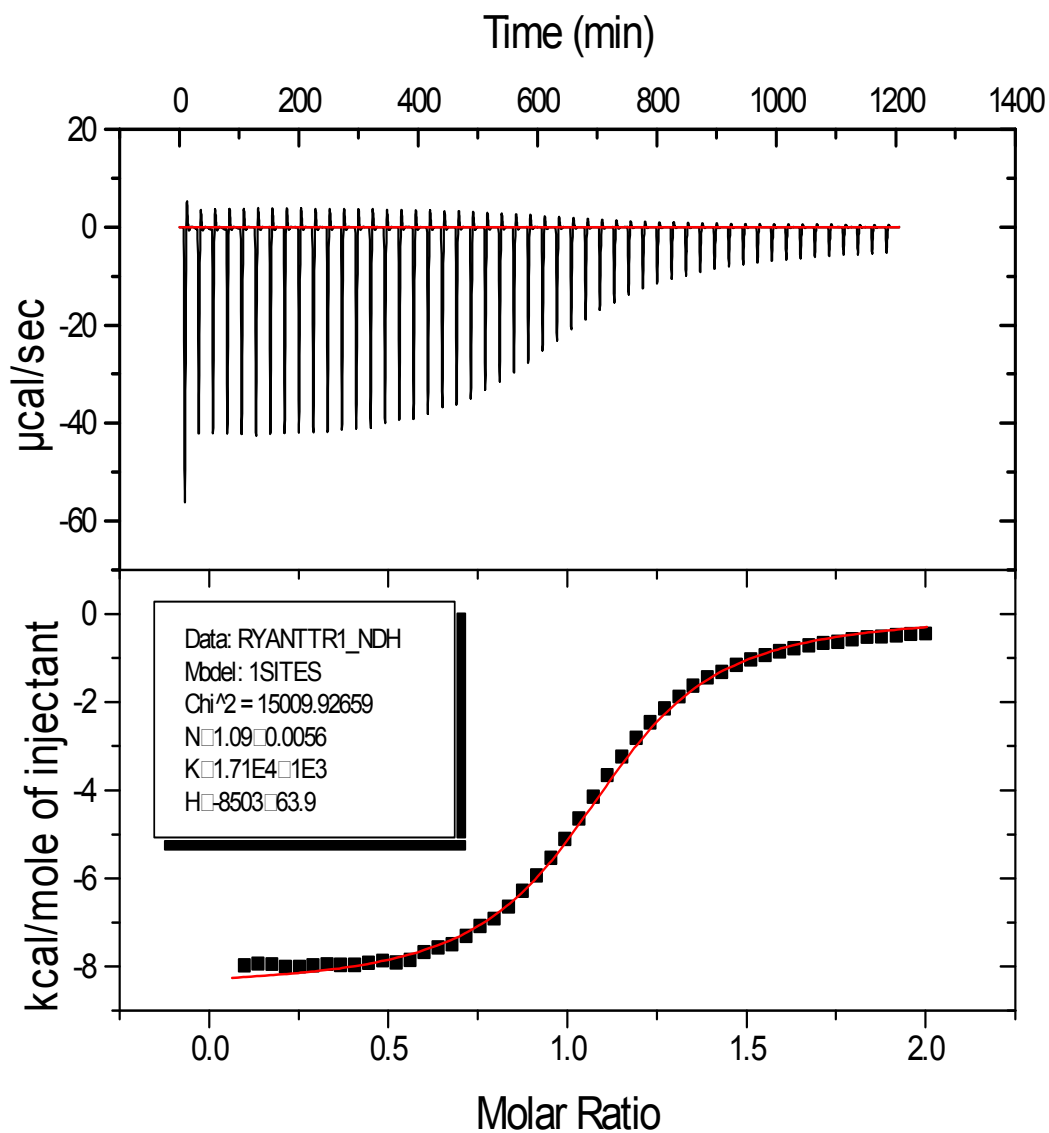

<sup>1</sup> Gibson, H. W.; Nagvekar, D. S. *Can. J. Chem.* **1997**, 75, 1375-1384.

<sup>2</sup> Shen, Y. X.; Engen, P. T.; Berg, M. A. G.; Merola, J. S.; Gibson, H. W. *Macromolecules* **1992**, 25, 2786-2787.

<sup>3</sup> Job, A. *Liebigs. Ann. Chem.* **1928**, 9, 113.
